# Supplementary material
Source: bioRxiv or medRxiv preprint supplement (https://www.medrxiv.org/content/medrxiv/early/2021/01/15/2021.01.13.21249429/DC1/embed/media-1.pdf)
Supplement: Supplementary file [file media-1.pdf]

## SUPPL. FIGURE 1

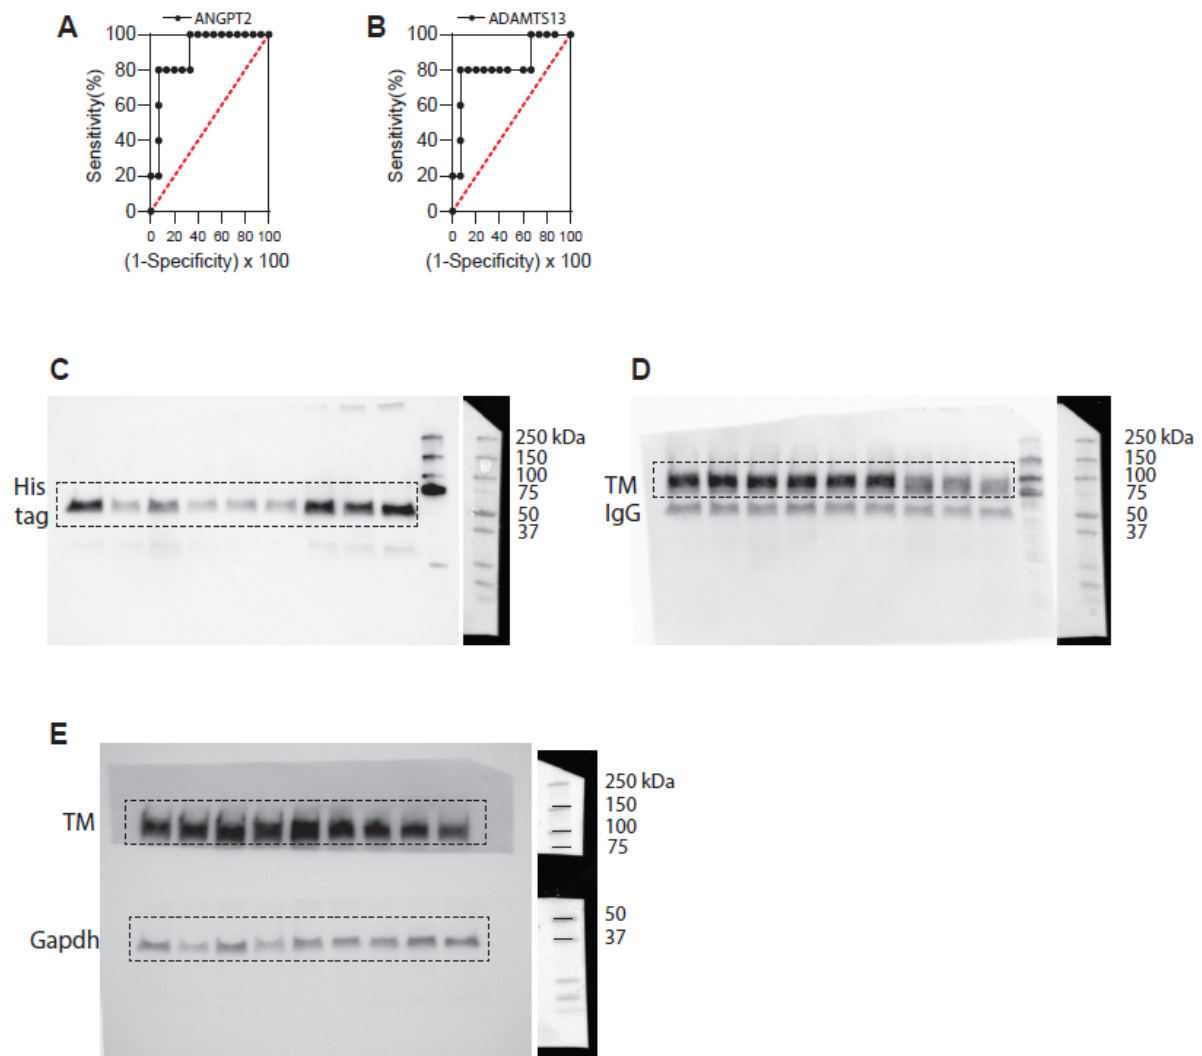

### Supplemental Figure 1.

Receiver operating characteristics (ROC) curves for ANGPT2 (A) and ADAMTS13 (B). Whole blots for His tag (C), thrombomodulin (D), thrombomodulin, and Gapdh (E). IgG band in (D) comes from rabbit IgG antibody conjugated to Dynabeads for immunoprecipitation. Dashed line indicates cut out for Fig. 3.
